# Supplementary material
Source: publisher site journal article supplement (https://www.spandidos-publications.com/2327/downloadSupplementary)
Supplement: Supplementary file 1 [file downloadSupplementary]

Video S1. Video follow-up of drinking water 2 years following the operation.

Video S2. Video follow-up of walking 2 years following the operation.
